# Supplementary material for: The ABCC6 Transporter: A New Player in Biomineralization
Source: Int J Mol Sci. 2017 Sep 11;18(9):1941. doi: 10.3390/ijms18091941 (PMC5618590; doi:10.3390/ijms18091941)
Supplement: Supplementary file 1 [file ijms-18-01941-s001.xlsx]

## Sheet: Sheet1
sequence variation at protein level	type of mut.	References
p.W38S	m	Schulz et al, 2006
p.R166C	m	MartinL et al, 2008
p.G226R	m	Chassaing et al, 2005, Bergen et al, 2007
p.L252F	m	Schulz et al, 2006
p.S317R	m	Pfendner et al, 2007
p.S317R	m	Miksch et al, 2005
p.L355R	m	Miksch et al, 2005, Nitschke et al, 2012
p.T364R	m	Pulkkinen et al, 2001; Gheduzzi et al, 2004; Hu et al, 2003; Miksch et al, 2005, Chassaing et al, 2005, Bergen et al, 2007, Hu et al, 2003
p.T364M	m	Vanakker2008
p.N370D	m	Miksch et al, 2005
p.R382W	m	Pfendner et al, 2007
p.R391G	m	Pfendner et al, 2007; Pulkkinen et al, 2001; Chassaing et al, 2004; Miksch et al, 2005; Gotting et al, 2004, Chassaing et al, 2005, Bergen et al, 2007, Ringpfeil et al, 2006, Schulz et al, 2006, Nitschke et al, 2012, Costrop et al, 2010
p.K392N	m	Pfendner et al, 2007
p.S398G	m	Miksch et al, 2005
p.S398R	m	Vanakker et al, 2008
p.N411K	m	LeSaux et al, 2001, Chassaing et al, 2005, Bergen et al, 2007, Gheduzzi et al, 2004, Hu et al, 2003
p.V415A	m	Schulz et al, 2006
p.C440G	m	Gheduzzi et al, 2004; Chassaing et al, 2005, Bergen et al, 2007
p.A455P	m	Uitto et al, 2001, LeSaux et al, 2001, Chassaing et al, 2005, Hu 2003 et al, , Ringpfeil et al, 2001
p.L463H	m	Pfendner 2007
p.N466Y	m	Vanakker et al, 2008
p.R487Q	m	Schulz et al, 2006
p.L495H	m	Pfendner et al, 2007; Miksch et al, 2005
p.N497K	m	Schulz et al, 2006
p.T500P	m	Vanakker et al, 2008
p.K502M	m	Chassaing et al, 2005, Bergen et al, 2007
p.R518Q	m	Pfendner et al, 2007 ; Chassaing et al, 2004; Gheduzzi et al, 2004 ; LeSaux et al, 2000; Miksch et al, 2005 ; Ringpfeil et al, 2001, LeSaux et al, 2001 ; Uitto et al, 2001, Chassaing et al, 2005, Bergen et al, 2007, LeSaux et al, 2002, Hu2003 et al, , Faria et al, 2013, RamsayM et al, 2009 , Costrop et al, 2010
p.E521D	m	Vanakker et al, 2008
p.S535P	m	Pfendner et al, 2007
p.F551S	m	Miksch et al, 2005
p.M562T	m	Plomp et al, 2008
p.F568S	m	LeSaux et al, 2001 , Pfendner et al, 2007, Chassaing 2005 et al, , Bergen et al, 2007, Ringpfeil et al, 2006, Hu et al, 2003
p.S590F	m	Nitschke2012
p.A594V	m	Miksch et al, 2005
p.R600C	m	Pfendner et al, 2007, Costrop et al, 2010
p.G663C	m	Pfendner et al, 2007
p.L673P	m	LeSaux et al, 2001, Chassaing et al, 2005, Bergen et al, 2007, LeSaux et al, 2002 , Hu et al, 2003
p.L677P	m	Miksch et al, 2005
p.Q698P	m	Pfendner et al, 2007
p.E699D	m	Pfendner et al, 2007
p.L726P	m	Pfendner et al, 2007 , RamsayM et al, 2009
p.M751K	m	Pfendner et al, 2007 ; Hendig et al, 2005 ; Gotting et al, 2004, Schulz et al, 2005, Schulz et al, 2006
p.G755R	m	Pfendner 2007
p.R760W	m	Pfendner et al, 2007 ; Schulz et al, 2005 ; Gotting et al, 2004; Miksch et al, 2005 ; Hendig et al, 2005, Schulz et al, 2006
p.R760Q	m	Vanakker et al, 2008
p.R765W	m	Vanakker et al, 2008
p.R765Q	m	Hendig et al, 2005 ; Hu et al, 2003 ; Hu et al, 2004 ; LeSaux et al, 2002; Miksch et al, 2005 ; Schulz et al, 2005; Gotting et al, 2004, Pfendner et al, 2007; LeSaux 2001, Chassaing et al, 2005, Bergen et al, 2007, Schulz et al, 2006, Hu2003, LeBoulanger et al, 2009
p.A766D	m	Chassaing 2004, Chassaing2005, Bergen2007
p.D777N	m	Pfendner et al, 2007
p.A781V	m	Chassaing et al, 2005, Bergen et al, 2007
p.N793L	m	Vanakker et al, 2008
p.R807W	m	Miksch et al, 2005
p.R807Q	m	Miksch et al, 2005 Chassaing et al, 2005, Bergen et al, 2007
p.V810M	m	Chassaing et al, 2005; Gheduzzi et al, 2004 , Bergen et al, 2007
p.T811M	m	Pfendner et al, 2007 ; Ringpfeil et al, 2006
p.A820P	m	Chassaing et al, 2005; Gheduzzi et al, 2004, Bergen et al, 2007
p.L826P	m	Plomp et al, 2008
p.L851P	m	Hendig et al, 2005 ; Schulz et al, 2006
p.R881S	m	Pfendner et al, 2007
p.T944I	m	Pfendner et al, 2007
p.A950T	m	Pfendner et al, 2007
p.R964P	m	Plomp et al, 2008
p.Q981H	m	Vanakker et al, 2008
p.G992R	m	Chassaing et al, 2005; Schulz et al, 2006; Pfendner et al, 2007, Bergen et al, 2007
p.L1025P	m	Vanakker2008
p.S1049A	m	Schulzet al, 2006
p.D1056E	m	Miksch et al, 2005
p.L1063R	m	Schulz et al, 2006
p.R1114C	m	Gheduzzi et al, 2004 ; Miksch et al, 2005; Schulz et al, 2005; Gotting et al, 2004; Klein et al, 2001, Chassaing et al, 2005, Bergen et al, 2007, Schulz et al, 2006, Schulz et al, 2005, Nitschke et al, 2012
p.R1114P	m	LeSaux et al, 2001, LeSaux et al, 2000 , Uitto et al, 2001, Chassaing et al, 2005, Bergen et al, 2007, Audo et al, 2007, Hu et al, 2003, Ringpfeil et al, 2001
p.R1114H	m	Hu et al, 2003, Götting et al, 2004, Chassaing et al, 2005, Bergen et al, 2007, Hu et al, 2004, Schulz2005, Schulz et al, 2006, Schulz2005
p.S1121L	m	Miksch et al, 2005
p.S1121W	m	LeSaux et al, 2001 , Chassaing et al, 2005, Bergen et al, 2007, Hu et al, 2003
p.T1130M	m	Chassaing 2004; Gheduzzi 2004 ; Hu 2003; Hu 2004;Miksch 2005; Ringpfeil 2000; Schulz 2005; Gotting 2004; Klein 2001, Pfendner 2007, Chassaing2005, Bergen2007, Morcher2003, Schulz2006, Shi2007, Schulz2005, Martin L2008
p.G1133C	m	Dreraet al, 2007
p.G1133A	m	Pfendner et al, 2007
p.R1138W	m	Ringpfeil et al, 2000; Miksch et al, 2005, Uitto et al, 2001, LeSaux et al, 2001, Chassaing et al, 2005, Bergen et al, 2007, Ringpfeil et al, 2006, Schulz et al, 2006, Hu et al, 2003, Ringpfeil et al, 2001, Shi et al, 2007, HesseRJ et al, 2010
p.R1138Q	m	LeSaux 2001 ; Miksch 2005; Ringpfeil 2000, LeSaux2000, Uitto2001, Chassaing 2005; Gheduzzi 2004; Chassaing 2004, Bergen2007, LeSaux2002, Schulz2005, Schulz2006, Fabre2005, Hu2003c, Ringpfeil2001, Shi2007, Schulz2005, RamsayM 2009
p.R1138P	m	LeSaux et al, 2001, Chassaing et al, 2005, Bergen et al, 2007, Hu et al, 2003
p.A1139T	m	Pfendner 2007
p.R1164Q	m	Pfendner et al, 2007; Miksch et al, 2005, Ringpfeil et al, 2006
p.G1203D	m	LeSaux et al, 2001, Chassaing et al, 2005, Bergen et al, 2007, Hu et al, 2003
p.R1221C	m	Hu et al, 2003; Hu et al, 2004; Miksch et al, 2005; Noji et al, 2004; Pfendner et al, 2007, Bergen et al, 2007, Costrop et al, 2010
p.R1221H	m	Cotton et al, 1998, Pfendner et al, 2007, Nitschke et al, 2012
p.L1226I	m	Pfendner et al, 2007
p.R1235W	m	Miksch et al, 2005
p.D1238H	m	Chassaing et al, 2004, Chassaing et al, 2005, Bergen et al, 2007, MartinL et al, 2008
p.Y1239H	m	Schulz et al, 2006, Schulz et al, 2005
p.E1245D	m, pot.splice	Miksch et al, 2005
p.E1245E	s, pot. splice	Miksch et al, 2005
p.G1263R	m	Vanakker et al, 2008
p.R1273K	m	Meyer et al, 2005
p.E1293K	m	Meyer et al, 2005
p.V1298F	m	Pfendner et al, 2007; LeSaux et al, 2001 , Chassaing et al, 2005, Bergen et al, 2007, Hu et al, 2003
p.G1299S	m	Chassaing et al, 2005, Bergen et al, 2007
p.T1301I	m	LeSaux et al, 2001 , Chassaing et al, 2005, Bergen et al, 2007, Schulz et al, 2005, Schulz et al, 2006, Hu et al, 2003, Schulz et al, 2005
p.G1302R	m	Pfendner et al, 2007; Hu et al, 2003; Hu et al, 2004; LeSaux et al, 2001 ; Miksch et al, 2005, Chassaing et al, 2005, Bergen et al, 2007, Shi et al, 2007, Ramsay et al, 2009
p.A1303P	m	Pfendner et al, 2007; Hu et al, 2003; Hu et al, 2004; LeSaux et al, 2001 ; Miksch et al, 2005, Chassaing et al, 2005, Bergen et al, 2007
p.S1307P	m	Chassaing et al, 2005; Bergen et al, 2007
p.G1311E	m	Schulz et al, 2005, Schulz et al, 2006, Schulz et al, 2005
p.R1314W	m	LeSaux et al, 2000; LeSaux et al, 2001 ; Schulz et al, 2005; Pfendner et al, 2007, Uitto2001, Chassaing et al, 2005, Bergen et al, 2007, Schulz2006, Hu et al, 2003c, Ringpfeil et al, 2001, Schulz et al, 2005b, Nitschke et al, 2012
p.R1314Q	m	Pfendner et al, 2007; Klein et al, 2001, LeSaux et al, 2001; Miksch 2005, Chassaing et al, 2005, Bergen et al, 2007, Schulz et al, 2005, Schulz et al, 2006, Hu et al, 2003, Schulz et al, 2005
p.G1321S	m	LeSaux et al, 2001, Chassaing2005, Bergen2007, Hu2003
p.L1335P	m	Chassaing et al, 2004, Chassaing2005, RamsayM 2009
p.L1335Q	m	Pfendner et al, 2007
p.R1339C	m	Pfendner et al, 2007; Gheduzzi et al, 2004; LeSaux et al, 2001 ; Miksch et al, 2005; Struk et al, 2000, Uitto et al, 2001, Chassaing et al, 2005, Bergen et al, 2007, LeSaux et al, 2002 , Hu et al, 2003, Ringpfeil et al, 2001, Shi et al, 2007, Faria et al, 2013, Ramsay et al, 2009 , LaRUsso et al, 2010
p.R1339H	m	Pfendner et al, 2007;
p.R1339L	m	Miksch et al, 2005
p.I1342T	m	Pfendner et al, 2007
p.P1346S	m	Chassaing et al, 2005; Gheduzzi et al, 2004, Bergen et al, 2007
p.Q1347H	m, pot.splice	LeSaux et al, 2001 , Pfendner et al, 2007, Chassaing et al, 2005, Bergen et al, 2007, Hu et al, 2003
p.G1354R	m	Pulkkinen2001, Chassaing2005, Uitto2001, Bergen2007, Hu2003
p.R1357W	m	Miksch et al, 2005, Noji et al, 2004
p.D1361N	m	LeSaux et al, 2001, Chassaing et al, 2005, Bergen et al, 2007, Hu et al, 2003
p.K1394N	m	Huet al, 2003, Chassaing et al, 2005, Bergen et al, 2007, Hu 2004
p.E1400K	m	Chassaing et al, 2004, Chassaing et al, 2005, Gheduzzi et al, 2004, Bergen et al, 2007, Faria et al, 2013,
p.S1403R	m, pot.splice	Hendig 2005 , Schulz2006
p.G1405S	m	Vanakker et al, 2008
p.R1418Q	m	Meyer et al, 2005
p.I1424T	m	LeSaux et al, 2001, Chassaing et al, 2005, Bergen et al, 2007, Hu et al, 2003
p.G1481S	m	Pfendner 2007
p.G1501S	m	Pfendner et al, 2007
p.E125X	n	Miksch et al, 2005
p.Q199X	n	Yoshida et al, 2005, Chassaing et al, 2005
p.Y227X	n	Chassaing et al, 2005, Meloni et al, 2001, Bergen et al, 2007
p.E242X	n	Pfendner et al, 2007
p.Q363X	n	Pfendner et al, 2007
p.Q378X	n	Pfendner et al, 2007; Cai et al, 2001; Gheduzzi et al, 2004; Miksch et al, 2005; Chassaing et al, 2005, Bergen et al, 2007, Schulz et al, 2006, Hu et al, 2003, Hu et al, 2003, Schulz et al, 2005, LaRusso et al, 2010
p.R518X	n	Pfendner et al, 2007; Chassaing 2004; Gheduzzi 2004; Meloni 2001; Miksch 2005 ; Chassaing et al, 2005, Bergen et al, 2007, Ringpfeil et al, 2006, Schulz et al, 2006, Hu et al, 2003, Hu et al, 2003, Nitschke et al, 2012, Costrop et al, 2010
p.W721X	n	Miksch 2005
p.Q749X	n	Chassaing et al, 2005, Bergen et al, 2007, Hu et al, 2003
p.Y768X	n	LeSaux et al, 2001;Miksch et al, 2005 , Chassaing et al, 2005, Bergen et al, 2007, LeSaux et al, 2002, Hu2003 et al, Ramsay et al, 2009
p.Y837X	n	Hefferon et al, 2007
p.Q842X	n	Miksch et al, 2005
p.Y938X	n	Pfendner et al, 2007
p.R1030X	n	LeSaux et al, 2001, Gheduzzi et al, 2004; Chassaing et al, 2005, Bergen et al, 2007, LeSaux et al, 2002, Hu et al, 2003
p.Y1069X	n	Plomp et al, 2008
p.R1141X	n	Pfendner et al, 2007; Plomp et al, 2004; Pulkkinen et al, 2001; Bergen et al, 2000; Chassaing et al, 2004; Gheduzzi et al, 2004; Hu 2003; Hu 2004; LeSaux 2000; Miksch 2005; Ringpfeil 2000 ; Ringpfeil et al, 2001 et al, ; Schulz 2005a ; Struk 2000; Gotting et al, 2004 ; Klein 2001, LeSaux et al, 2001 , Uitto et al, 2001, Germain2000, Hendig et al, 2005 ; Trip2002, Cai2001, Chassaing et al, 2005, B…
p.Q1143X	n	Pfendner et al, 2007
p.R1164X	n	Chassaing et al, 2004; Meloni et al, 2001; Miksch et al, 2005 ; Ringpfeil et al, 2001; Struk et al, 2000, Pfendner et al, 2007, Uitto et al, 2001, LeSaux et al, 2001, Chassaing et al, 2005, Bergen et al, 2007, Wang2001, Huet al, 2003, Ringpfeil et al, 2001, Shi et al, 2007
p.W1223X	n	Chassaing2004, Chassaing2005, Bergen2007
p.Q1237X	n	LeSaux et al, 2001, Chassaing et al, 2005, Bergen et al, 2007, Hu et al, 2003
p.W1241X	n	Pfendner et al, 2007
p.R1275X	n	Chassaing et al, 2005; Gheduzzi et al, 2004 , Bergen et al, 2007
p.R1398X	n	LeSaux et al, 2001, Pfendner et al, 2007, Chassaing et al, 2005, Bergen et al, 2007, Hu et al, 2003
p.S37fsX80	del, fs	Miksch et al, 2005
p.R60_Y62del	del	Pulkkinen et al, 2001; Miksch et al, 2005; Chassaing et al, 2005; Bergen et al, 2007; Hu et al, 2003
	del, fs	LeSaux et al, 2001; Chassaing et al, 2005; Bergen et al, 2007; Hu et al, 2003
p.V74del	del	Chassaing et al, 2004, Chassaing et al, 2005, Bergen et al, 2007
p.A151Rfs	ins, fs	Nitschke et al, 2012
p.W237Sfs*21	dup	Tanet al, 2012
	del, fs	LeSaux et al, 2002
	ins, fs	LeSauxet al, 2001 , Chassaing et al, 2005, Bergen et al, 2007, LeSaux et al, 2002 , Hu2003 et al
p.I320fs	del, fs	Chassaing et al, 2005; Meloni et al, 2001, Bergen et al, 2007, Hu et al, 2003
p.363_374QTLFEQQNMYRdel	del	Chassaing et al, 2004 , Chassaing et al, 2005, Bergen et al, 2007, MartinL et al, 2008
p.L525fsX73	ins, fs	Schulz et al, 2006
p.A558fs	del, fs	Vanakker et al, 2008
	fs	Pfendner et al, 2007
p648fsX688	del, fs	LeSaux et al, 2001, Hu2003 et al , Bergen et al, 2000, Hu et al, 2004 , Hu2003, Hu et al, 2003, Ringpfeil et al, 2001
	fs	Bergen et al, 2000
p.A667fsX20	del, fs	LeSaux et al, 2001 , Hendig et al, 2005, Chassaing et al, 2005, Bergen et al, 2007, Schulz et al, 2005, Schulz et al, 2006, Hu et al, 2003, Schulz et al, 2005
	fs	Pfendner et al, 2007
p.774Yfs	del, fs	LeSaux et al, 2001, Chassaing et al, 2005, Bergen et al, 2007, Hu2003
p.2848fs	del, fs	Uitto et al, 2001, LeSaux et al, 2001, Chassaing et al, 2005, Bergen et al, 2007, Noji et al, 2004, Hu et al, 2003c, Ringpfeil et al, 2001, SatoN et al, 2009, La Russo et al, 2010
	fs	Pfendner et al, 2007
p.P946fsX17	del, fs	Hendig et al, 2005 , Schulz et al, 2006
p.F1036del	del	Nitschke et al, 2012
p.F1036del	del	Miksch et al, 2005
p.F1048del	del	Miksch et al, 2005
p.S1122Lfs	fs	Vanakker et al, 2008
p.L1182PfsX1278	dup, fs	Chassaing et al, 2005, Bergen et al, 2007, Gheduzzi et al, 2004
p.L1259fs	ins, fs	Miksch et al, 2005
p.W1259Gfs	del, fs	LeSaux et al, 2000 , Uitto et al, 2001, LeSaux et al, 2001 , Bergen et al, et al, 2000, Hu et al, 2003 , Miksch et al, 2005 , Chassaing et al, 2005, Bergen et al, 2007, LeSaux et al, 2002 , Hu et al, 2004 , Hu et al, 2003, Schulz et al, 2006, Hu et al, 2003, Ringpfeil et al, 2001, Schulz et al, 2005, RamsayM et al, 2009 , Plompet al, 2009
	fs	Bergen et al, 2007
p.1274Ydel16	del	Hu et al, 2004
p.S1305fsX1358	del, fs	Miksch et al, 2005
p.D1368Efs	del, fs	LeSaux et al, 2001 , Chassaing et al, 2005, Bergen et al, 2007, LeSaux et al, 2002, RamsayM et al, 2009
p.N1394fsX8	del, fs	Hu2003 et al , Chassaing et al, 2005, Bergen et al, 2007, Hu et al, 2004, Schulz et al, 2005 , Schulz et al, 2006, Schulz et al, 2005, Vanakker et al, 2008
	ins, fs	Uitto et al, 2001, LeSaux et al, 2001, Bergen et al, 2000, Hu2003 et al, , Chassaing et al, 2005, Bergen et al, 2007, Hu et al, 2004 , Plomp et al, 2004, Hu2003 et al, , Ringpfeil et al, 2001
p.T1436fs	fs	Plomp 2008
p.1440fsX1464	del, fs	Chassaing 2005; Gheduzzi 2004 , Bergen2007
p.R1479fsX25	del, fs	Hendig et al, 2005 ; Schulz et al, 2006
